- oligonucleotides to p65 subunit of NF-kappaB. *Br J Anaesth* 2006; 97:553–8
28. de Mos M, Laferrière A, Millicamps M, Pilkington M, Sturkenboom MC, Huygen FJ, Coderre TJ: Role of NFkappaB in an animal model of complex regional pain syndrome-type I (CRPS-I). *J Pain* 2009; 10:1161–9
  29. Watkins LR, Milligan ED, Maier SF: Glial activation: A driving force for pathological pain. *Trends Neurosci* 2001; 24:450–5
  30. Watkins LR, Maier SF: Glia: A novel drug discovery target for clinical pain. *Nat Rev Drug Discov* 2003; 2:973–85
  31. Barnes PJ, Karin M: Nuclear factor-kappaB: A pivotal transcription factor in chronic inflammatory diseases. *N Engl J Med* 1997; 336:1066–71
  32. Abbadie C, Besson JM: c-fos expression in rat lumbar spinal cord during the development of adjuvant-induced arthritis. *Neuroscience* 1992; 48:985–93
  33. Meller ST, Gebhart GF: Nitric oxide (NO) and nociceptive processing in the spinal cord. *Pain* 1993; 52:127–36
  34. Chan CF, Sun WZ, Lin JK, Lin-Shiau SY: Activation of transcription factors of nuclear factor kappa B, activator protein-1 and octamer factors in hyperalgesia. *Eur J Pharmacol* 2000; 402:61–8
  35. Lee KM, Kang BS, Lee HL, Son SJ, Hwang SH, Kim DS, Park JS, Cho HJ: Spinal NF-kB activation induces COX-2 upregulation and contributes to inflammatory pain hypersensitivity. *Eur J Neurosci* 2004; 19:3375–81
  36. DeLeo JA, Tanga FY, Tawfik VL: Neuroimmune activation and neuroinflammation in chronic pain and opioid tolerance/hyperalgesia. *Neuroscientist* 2004; 10:40–52
  37. Torgerson TR, Colosia AD, Donahue JP, Lin YZ, Hawiger J: Regulation of NF-kappa B, AP-1, NFAT, and STAT1 nuclear import in T lymphocytes by noninvasive delivery of peptide carrying the nuclear localization sequence of NF-kappa B p50. *J Immunol* 1998; 161:6084–92

## ANESTHESIOLOGY REFLECTIONS FROM THE WOOD LIBRARY-MUSEUM

### Messing around Allentown: Paul Meyer Wood

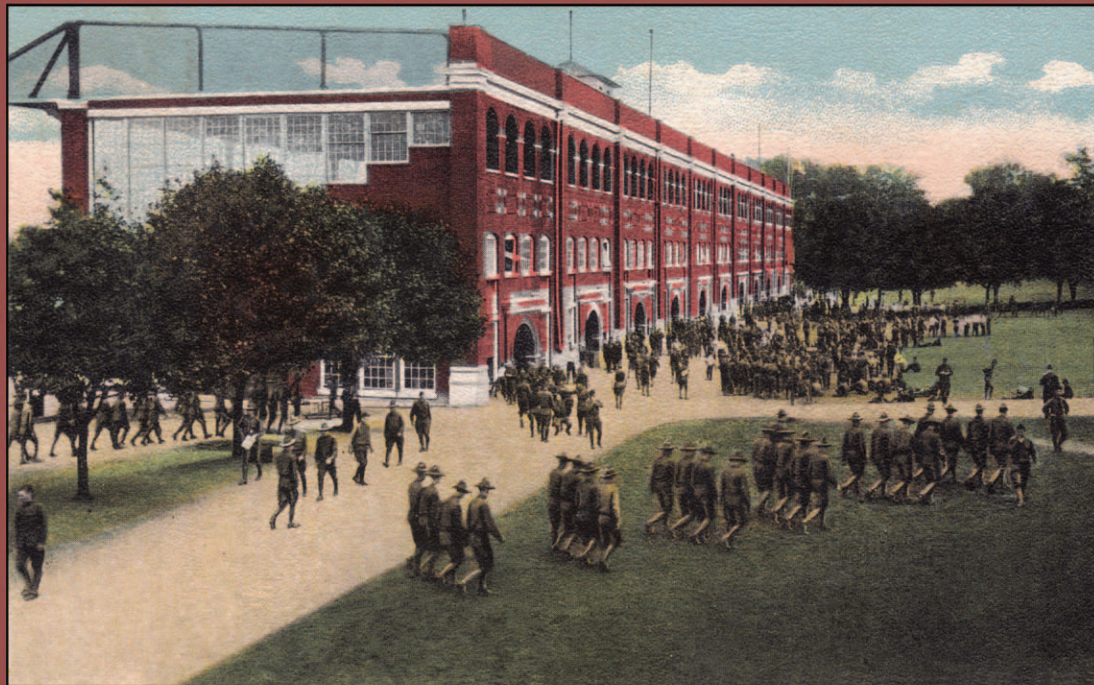

The U.S. Army Ambulance Corps (USAAC) was the outfit that medical student Paul Meyer Wood joined before mobilizing to the Italian Front during World War I. His stateside training occurred in Pennsylvania, as depicted in the postcard scene (above) titled “GOING TO MESS, U.S.A.A.C., ALLENTOWN, PA.” The word “mess” has a messy etymology. “Having been put or placed” (Latin *missus*) a “dining course” evolved into a similarly defined Old French word (*mes*) which crossed the Channel to become a 14th-Century English noun for food portion and then verb for serving up food portions (*mess*). Disorganized jumble was not associated with that word for another three centuries. So recruits were not under military orders to be sloppy diners in the U.S.A.A.C. Mess Hall.... (Copyright © the American Society of Anesthesiologists, Inc.)

George S. Bause, M.D., M.P.H., Honorary Curator, ASA's Wood Library-Museum of Anesthesiology, Park Ridge, Illinois, and Clinical Associate Professor, Case Western Reserve University, Cleveland, Ohio. UJYC@aol.com.
